# Supplementary material for: Meiotic Interactors of a Mitotic Gene TAO3 Revealed by Functional Analysis of its Rare Variant
Source: PubMed Central journal article supplement (PMC4978881; doi:10.1534/g3.116.029900), 2016-06-14
Supplement: supp_g3.116.029900_FigureS1.pdf [file supp_g3.116.029900_FigureS1.pdf]

Log-Alpha across strains  
(leave one out bootstrap)

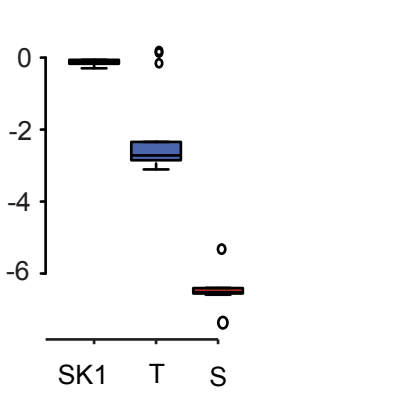

Log-Beta across strains  
(leave one out bootstrap)

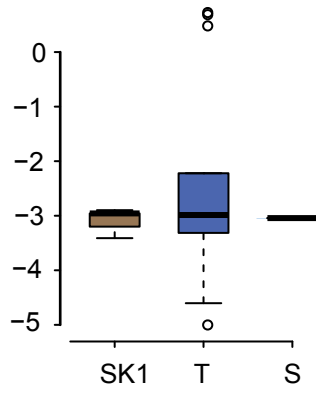

Log-Gamma across strains  
(leave one out bootstrap)

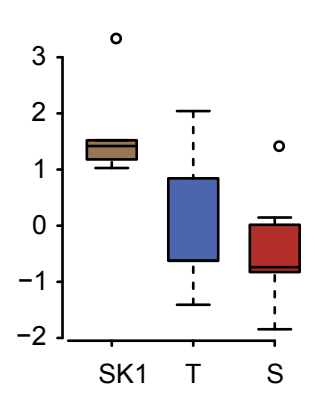

Log-Delta across strains  
(leave one out bootstrap)

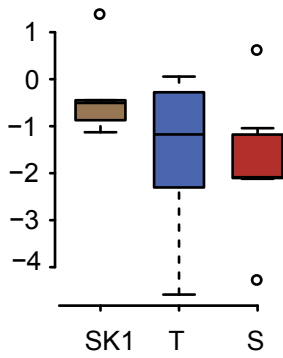

Log-Tau across strains  
(leave one out bootstrap)

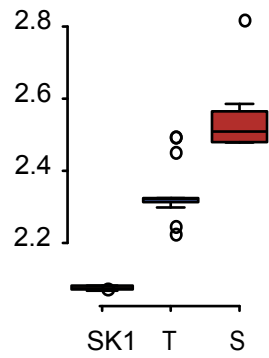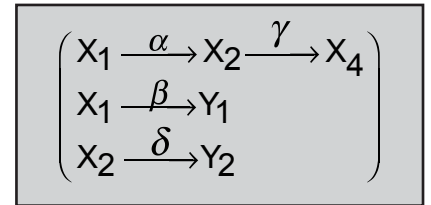

**Figure S1. Mathematical modeling to identify stage of meiosis affected by *TAO3* causal allele.** Log of parameters (y-axis) calculated according to the equation shown by studying the proportion of yeast cells entering various stages during meiosis in SK1, T and S strain (x-axis). See methods for details. In the equation shown above the figure,  $X_1$  is proportion of cells in 1-nucleus active stage,  $X_2$  in 2-nuclei active stage,  $X_4$  in 4-nuclei active stage,  $Y_1$  is proportion of cells in 1-nucleus inactive stage,  $Y_2$  in 2-nucleus inactive stage.
