# Supplementary material for: Meiotic Interactors of a Mitotic Gene TAO3 Revealed by Functional Analysis of its Rare Variant
Source: PubMed Central journal article supplement (PMC4978881; doi:10.1534/g3.116.029900), 2016-06-14
Supplement: supp_g3.116.029900_FigureS2.pdf [file supp_g3.116.029900_FigureS2.pdf]

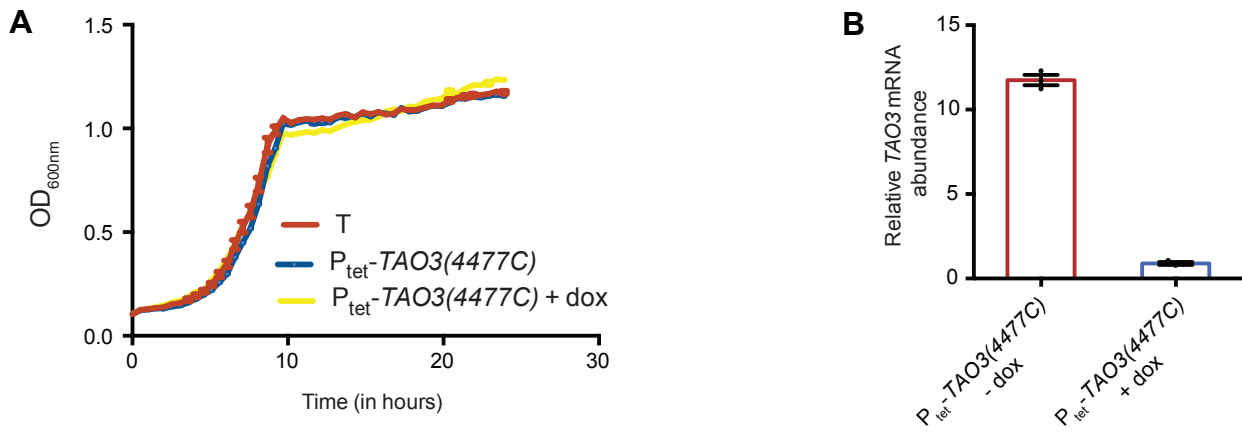

**Figure S2. Effect of doxycycline on growth and expression of TAO3(4477C)** (A) Growth curve of T strain in rich medium (red), P<sub>tet</sub>-TAO3(4477C) strain in rich medium (blue) and P<sub>tet</sub>-TAO3(4477C) strain in rich medium with doxycycline (yellow). X-axis shows the time for which the strain was growth and Y-axis depicts the mean absorbance at wavelength of 600nm (N=3, n=4). Error bars depict standard deviation. (B) Quantitation of TAO3 mRNA abundance by performing quantitative PCR for P<sub>tet</sub>-TAO3(4477C) strain in rich medium in absence and presence of doxycycline, relative to S strain is shown on the Y-axis (N=3, n=4). Error bars depict standard error of means.
