# Supplementary material for: Meiotic Interactors of a Mitotic Gene TAO3 Revealed by Functional Analysis of its Rare Variant
Source: PubMed Central journal article supplement (PMC4978881; doi:10.1534/g3.116.029900), 2016-06-14
Supplement: supp_g3.116.029900_FigureS3.pdf [file supp_g3.116.029900_FigureS3.pdf]

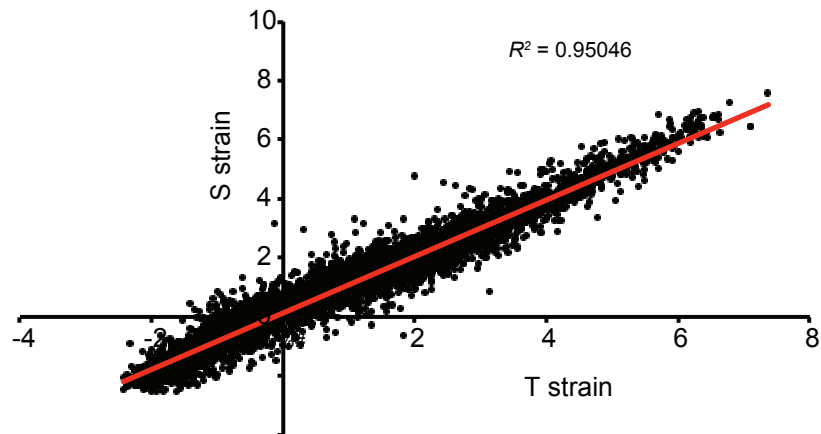

**Figure S3. Comparison of global gene expression between the T and S strains at time t = 0h.** Log<sub>2</sub> gene expression for all genes depicted as black dots is shown for t=0h for T strain on X-axis and S strain on Y-axis. Red line depicts the correlation between the two strains, which is 0.95.
