# Supplementary material for: Meiotic Interactors of a Mitotic Gene TAO3 Revealed by Functional Analysis of its Rare Variant
Source: PubMed Central journal article supplement (PMC4978881; doi:10.1534/g3.116.029900), 2016-06-14
Supplement: supp_g3.116.029900_FigureS4.pdf [file supp_g3.116.029900_FigureS4.pdf]

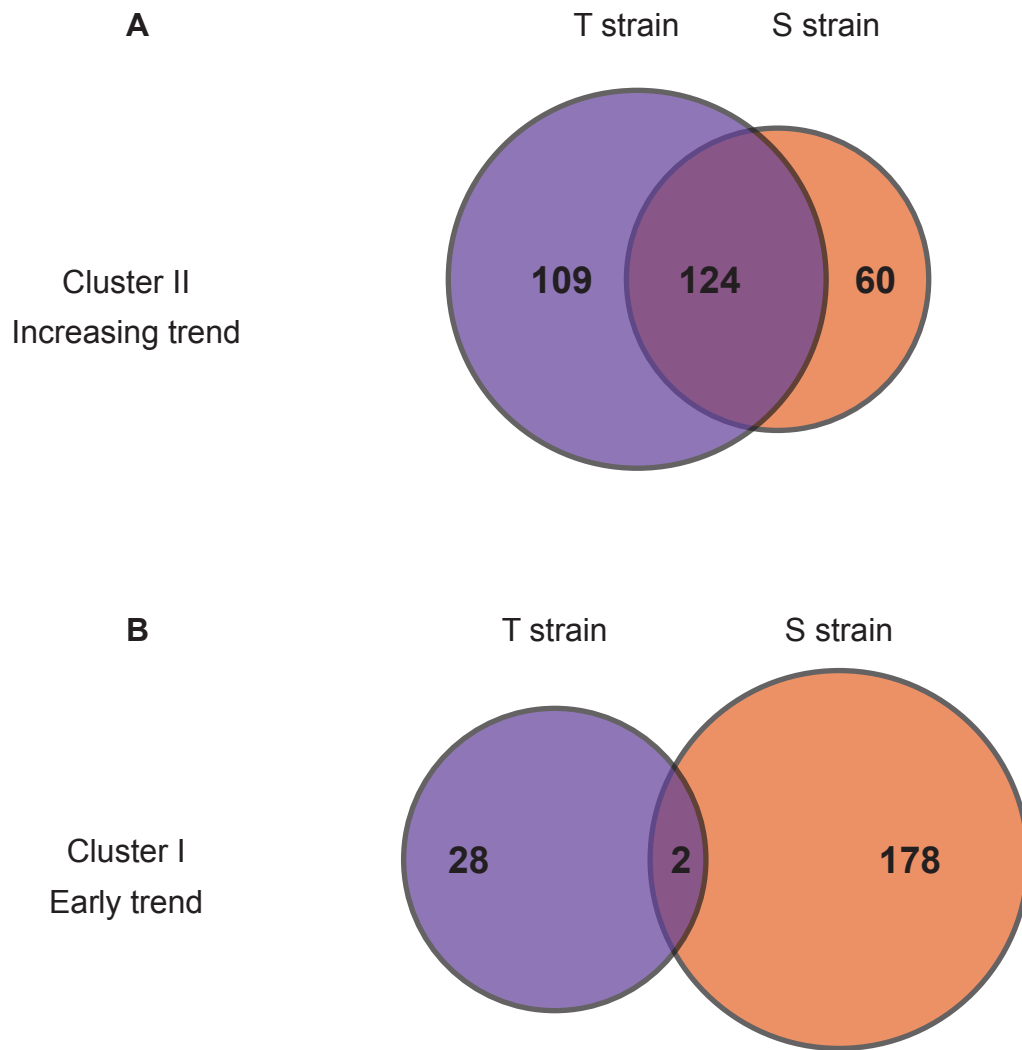

**Figure S4. Comparison of genes showing increasing trend (Cluster II) and early (Cluster I) between T and S strains**
