# Supplementary material for: Meiotic Interactors of a Mitotic Gene TAO3 Revealed by Functional Analysis of its Rare Variant
Source: PubMed Central journal article supplement (PMC4978881; doi:10.1534/g3.116.029900), 2016-06-14
Supplement: supp_g3.116.029900_FigureS5.pdf [file supp_g3.116.029900_FigureS5.pdf]

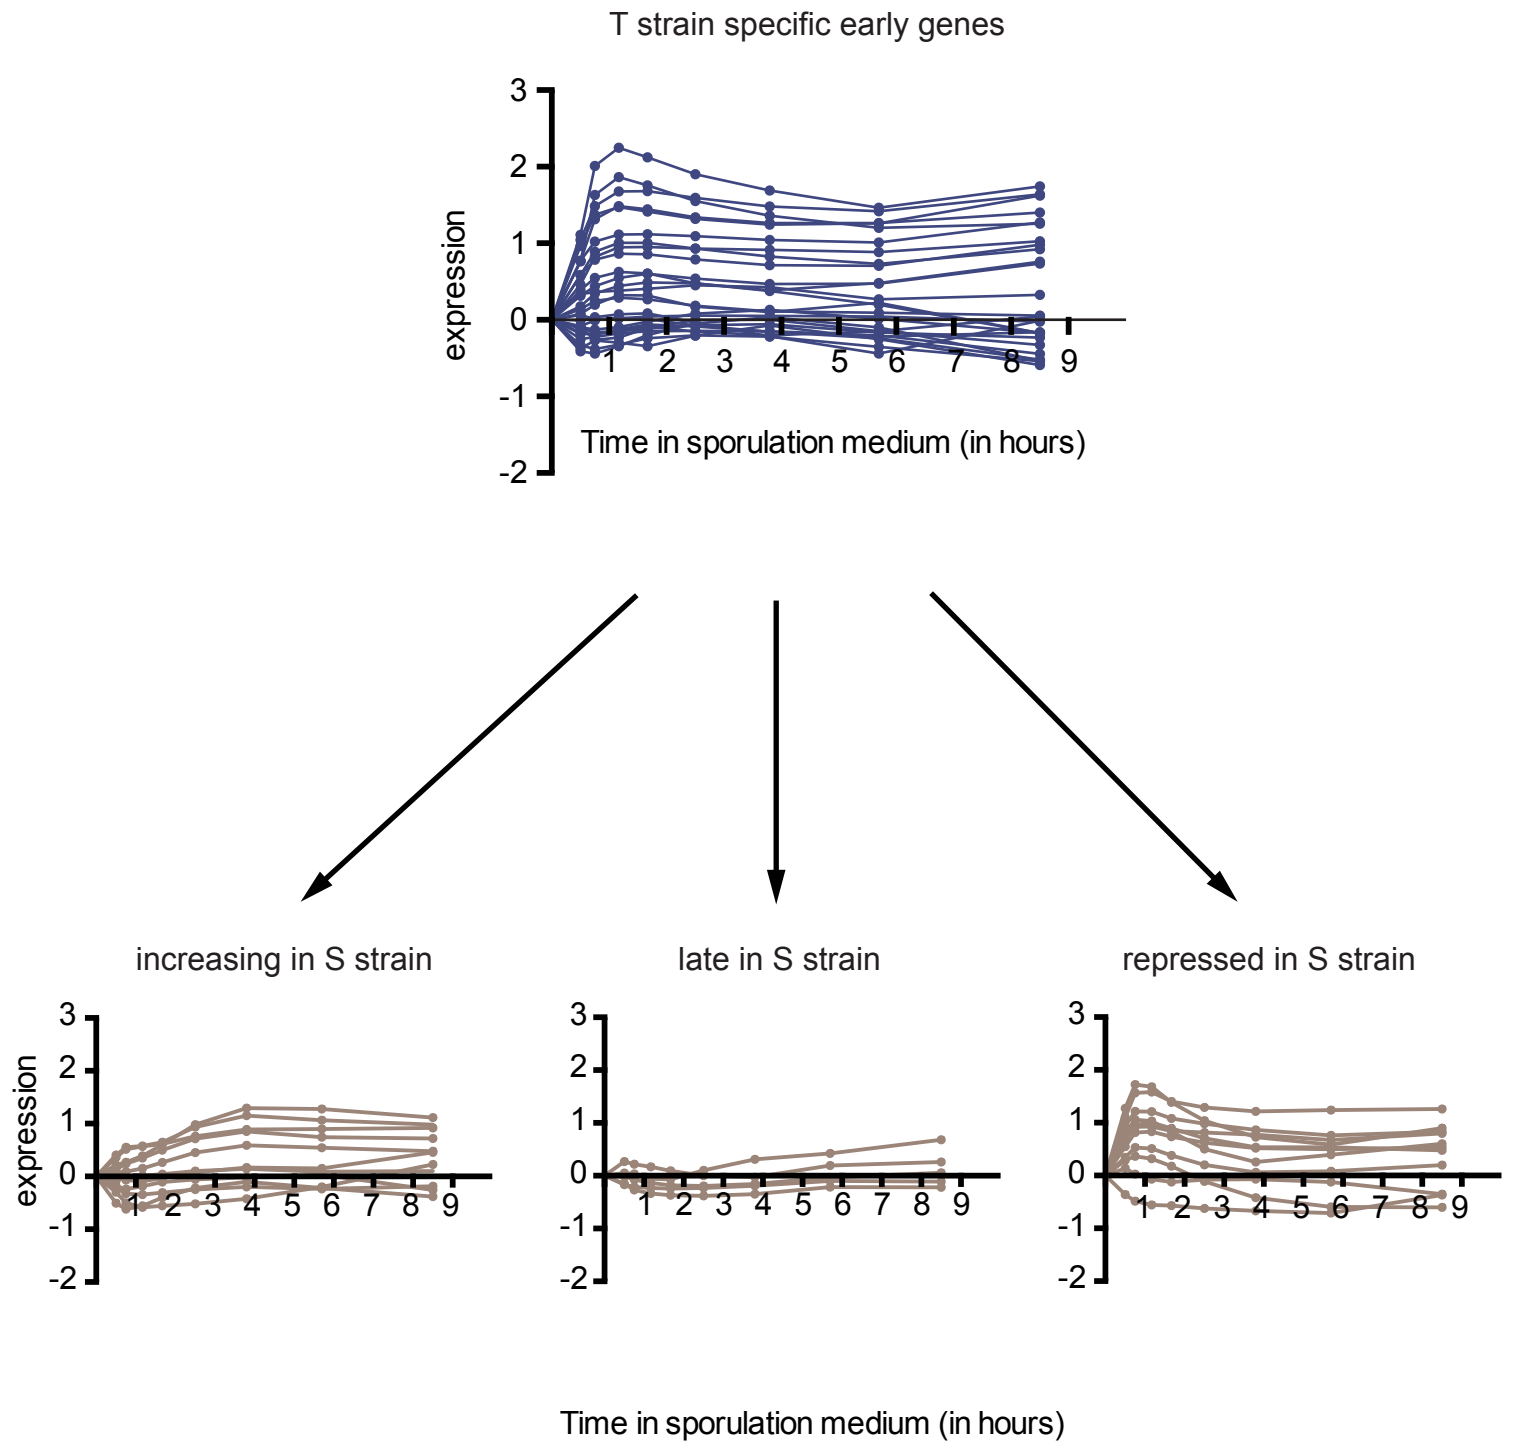

**Figure S5. Genes showing early expression in T strain, show expression in later time points or are repressed in S strain.** Gene expression is shown on Y-axis and time in sporulation medium is shown in X-axis. For gene list in each cluster see Supporting Table S6.
