# Supplementary material for: Meiotic Interactors of a Mitotic Gene TAO3 Revealed by Functional Analysis of its Rare Variant
Source: PubMed Central journal article supplement (PMC4978881; doi:10.1534/g3.116.029900), 2016-06-14
Supplement: supp_g3.116.029900_FigureS7.pdf [file supp_g3.116.029900_FigureS7.pdf]

Expression

T strain

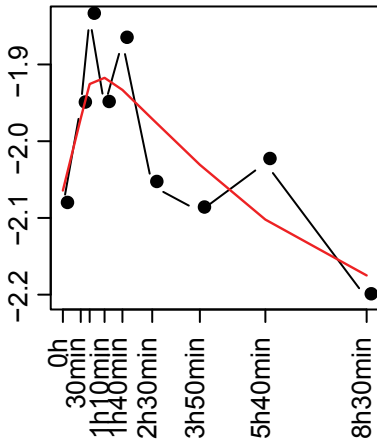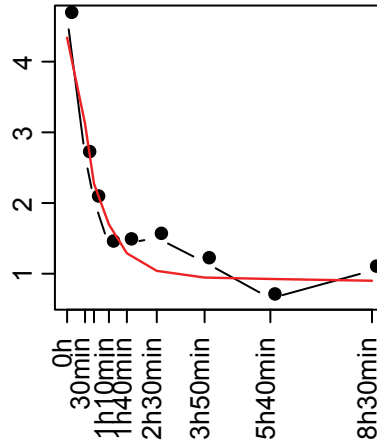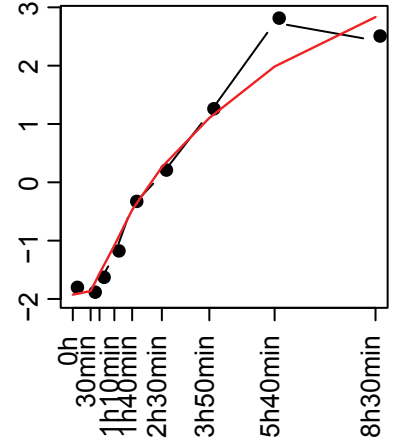

S strain

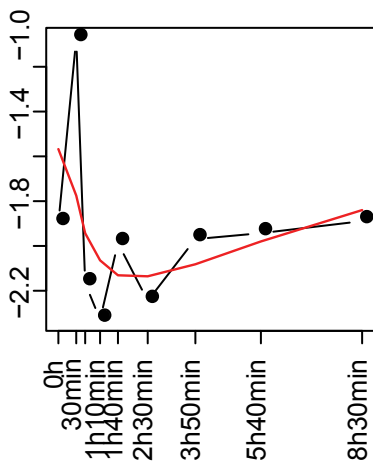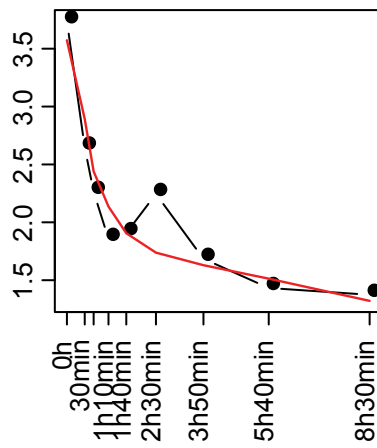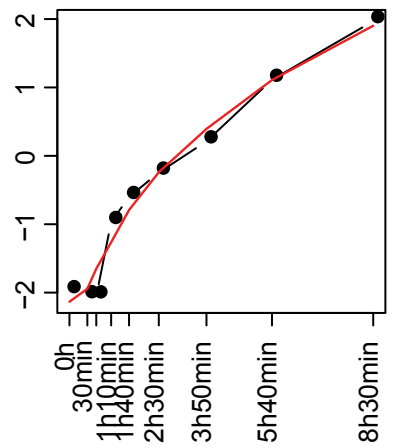

VPS65

URA1

HOP2

**Figure S7. Smoothing of normalized temporal data using *locfit*.** Representative images showing normalized (black line) and normalized *locfit* (red line) data in T and S strain. x-axis denotes the time-points in sporulation medium and y-axis is the  $\log_2$  expression
